# Supplementary material for: Methylation status of insulin-like growth factor-binding protein 7 concurs with the malignance of oral tongue cancer
Source: PubMed Central journal article supplement (PMC4355468; doi:10.1186/s13046-015-0138-5), 2015-02-24
Supplement: 13046_2015_138_MOESM1_ESM.pdf [file 13046_2015_138_MOESM1_ESM.pdf]

### Supporting Information Table 1. PCR primers used in this study

| <b>Primer name</b>     |   | <b>Sequence</b>                     | <b>Product size (bp)</b> |
|------------------------|---|-------------------------------------|--------------------------|
| <b>IGFBP-7-RT-PCR</b>  | F | 5'- CACTGGTGCCCAGGTGTACT -3'        | 240                      |
|                        | R | 5'- TTGGATGCATGGCACTCATA -3'        |                          |
| <b>GAPDH</b>           | F | 5'- ACCACAGTCCATGCCATCAC -3'        | 452                      |
|                        | R | 5'- TCCACCACCCTGTTGCTGTA -3'        |                          |
| <b>IGFBP-7-MSP (M)</b> | F | 5'- GGGGTGTGGTTTTTCGCGGATAGGTC -3'  | 124                      |
|                        | R | 5'- CGCAACGACGACCGCTCCATAACG -3'    |                          |
| <b>IGFBP-7-MSP (U)</b> | F | 5'- TTGGGGTGTGGTTTTTGTGGATAGGTT -3' | 129                      |
|                        | R | 5'- ACACACAACAACAACCACTCCATAACA -3' |                          |
| <b>IGFBP-7-BGS</b>     | F | 5'- GGAAATGGGGAGAAATTAGA -3'        | 425                      |
|                        | R | 5'- AAAAAACAAAAACAAAAACAACAAC -3'   |                          |
