# Supplementary material for: Methylation status of insulin-like growth factor-binding protein 7 concurs with the malignance of oral tongue cancer
Source: PubMed Central journal article supplement (PMC4355468; doi:10.1186/s13046-015-0138-5), 2015-02-24
Supplement: 13046_2015_138_MOESM3_ESM.pdf [file 13046_2015_138_MOESM3_ESM.pdf]

**Supporting Information Table 2. Prognostic factors of disease-free survival in oral tongue patients.**

|                                | Univariate Analysis | Multivariate Analysis  |                              |                |
|--------------------------------|---------------------|------------------------|------------------------------|----------------|
|                                | <i>p</i> value      | Relative Risk of Death | 95% Confident Interval of RR | <i>p</i> value |
| Age ( $\leq 50$ / $>50$ years) | 0.869               | 0.79                   | 0.20-3.19                    | 0.741          |
| Gender (Female/Male)           | 0.844               | 0.7                    | 0.13-3.73                    | 0.676          |
| AJCC Stage (Early/Advanced)    | 0.025**             | 25.309                 | 1.52-421.75                  | 0.024**        |
| PNI (-/+)                      | 0.275               | 0.414                  | 0.09-1.95                    | 0.264          |
| LVP (-/+)                      | 0.208               | 0.506                  | 0.11-2.42                    | 0.393          |
| ECS (-/+)                      | 0.215               | 1.477                  | 0.38-5.83                    | 0.577          |
| Radiotherapy (-/+)             | 0.173               | 0.731                  | 0.10-5.49                    | 0.761          |
| Chemotherapy (-/+)             | 0.952               | 0.156                  | 0.02-1.18                    | 0.072*         |
| IGFBP7 Methylation (-/+)       | 0.025**             | 18.282                 | 1.01-332.43                  | 0.05*          |

PNI: perineural infiltration; LVP: lymphovascular permeation; ECS: extracapsular spread. \*  $p < 0.1$  , \*\*  $p < 0.05$
